# Supplementary material
Source: publisher figshare collection journal article supplement (https://acs.figshare.com/ndownloader/files/3926530)
Supplement: Supplementary file 1 [file 3926530]

---

# Assay of Biothiols by Regulating the Growth of Silver Nanoparticles with C-dots as Reducing Agent

*Li-Ming Shen<sup>a</sup>, Qing Chen<sup>a</sup>, Zheng-Yue Sun<sup>a</sup>, Xu-Wei Chen<sup>a\*</sup>, Jian-Hua Wang<sup>a,b\*</sup>*

*<sup>a</sup>Research Center for Analytical Sciences, College of Sciences, Box 332, Northeastern University, Shenyang 110819, China; <sup>b</sup>Collaborative Innovation Center of Chemical Science and Engineering, Tianjin, China*

**Overview** This supporting information section presents UV-vis spectra of AgNO<sub>3</sub> with Cys after incubation and UV-vis spectra of the nanocomposite after incubating AgNO<sub>3</sub> with C-dots in the absence and presence of Cys.

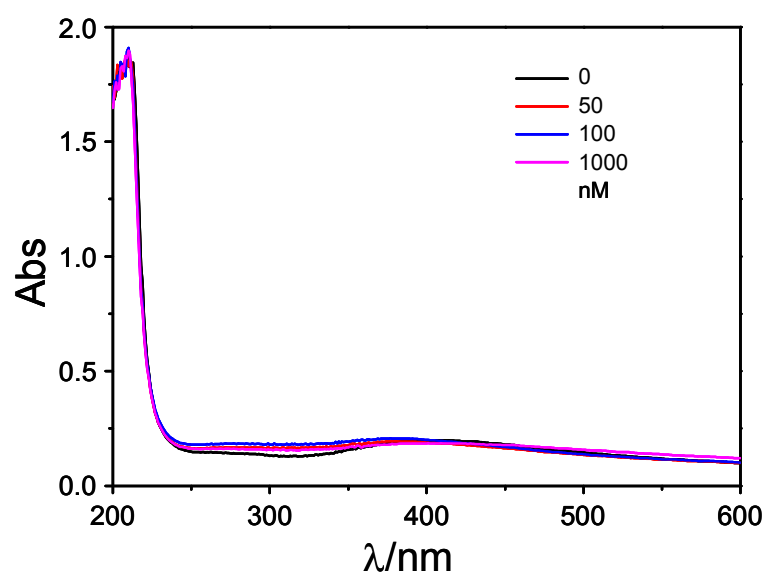

Figure S1. UV-vis spectra of AgNO<sub>3</sub> (0.1 mM) with Cys (0-1000 nM) in 0.01 M NaOH incubating at 70° for 5 min.

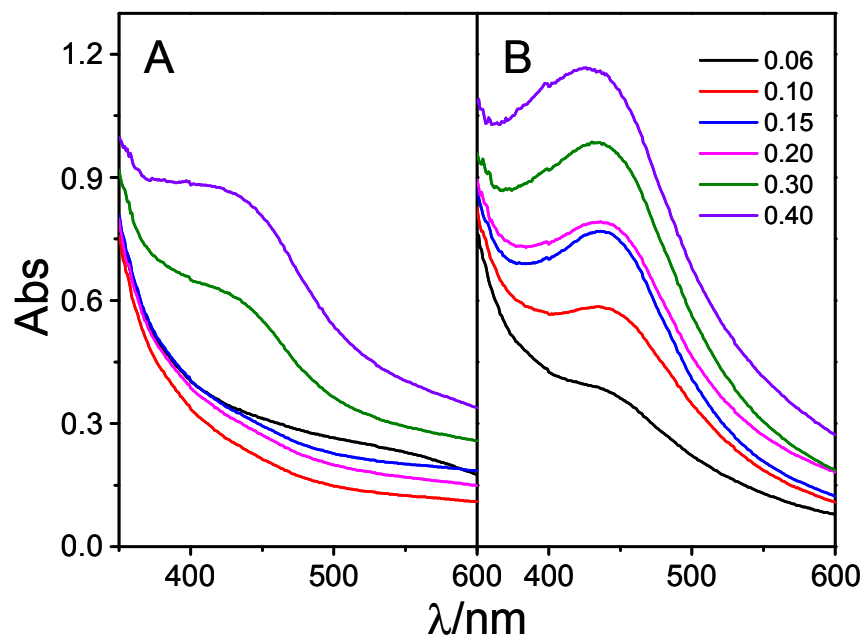

Figure S2. UV-vis spectra of the nanocomposite after incubating  $\text{AgNO}_3$  (0.05-0.40 mM) with C-dots ( $0.23 \text{ g L}^{-1}$ ) in the absence (A) and presence (B) of Cys (100 nM) in 0.01 M NaOH at  $50^\circ\text{C}$  for 5 min.
